# Supplementary material for: Detection and classification of unilateral cleft alveolus with and without cleft palate on panoramic radiographs using a deep learning system
Source: Research Square preprint supplement (doi:10.21203/rs.3.rs-173173/v1), 2021-06-03
Supplement: Supplementary file 1 [file 3156dbf04d354cff62eee4ea.xlsx]

## Sheet: Table 1
Table 1 Summary of datasets (number of panormaic images)
Group	Dataset
	Training	Validating	Testing	Total
CA only	115	29	30	174
CA with CP	143	36	30	209
Normal	144	36	30	210
Total	402	101	90	593
CA: cleft alveolus, CP: cleft palate

## Sheet: Table2
Table 2 Findings on the inferior line of the piriform aperture (number of images)
Group	Finding
	Clear and equivalent level*	Clear and inferior level**	Obscure or invisible	Total
CA only	20 (13.9%)	108 (75.0%)	16 (11.1%)	144 (100%)
CA with CP	1 (0.6%)	41 (22.9%)	137 (76.5%)	179 (100%)
Normal	163 (90.6%)	0 (0.0%)	17 (9.4%)	180 (100%)
*: The inferior line of the piriform aperture could be observed clearly on the both right and left sides at an equivalent level.
**: The inferior line of the piriform aperture on the affected side was clearly visible but located at an inferior level relative to the unaffected side, or the line on a side was located at an inferior level relative to the contralateral side in normal subjects.

## Sheet: Table 3
Table 3 Findings of the lateral incisor on the affected side (number of images)
Group	Appearance
	Absence*	Microdontia*	Unerupted*	Medial inclination*
CA only	51/144 (35.4%)	75/144 (52.1%)	68/144 (47.2%)	16/144 (11.1%)
CA with CP	77/179 (43.0%)	81/179 (45.3%)	77/179 (43.0%)	33/179 (18.4%)
Normal	19/180 (10.6%)	0/180 (0.0%)	5/180 (2.8%)	0/180 (0.0%)
*: Difference between dstributions is significant among three groups (p < 0.001)
